# Supplementary material for: Genetic Characterization of Microsporum canis Clinical Isolates in the United States
Source: J Fungi (Basel). 2022 Jun 28;8(7):676. doi: 10.3390/jof8070676 (PMC9321804; doi:10.3390/jof8070676)
Supplement: Supplementary file 1 [file jof-08-00676-s001.zip › Supplementary Tables Moskaluk 2022.pdf]

**Table S1. Survey provided to shelters and clinics for suspected dermatophytosis patients.**

| #   | Questions                                                             | Answer options                                                                                                                                                                                                                    |
|-----|-----------------------------------------------------------------------|-----------------------------------------------------------------------------------------------------------------------------------------------------------------------------------------------------------------------------------|
| 1   | Please enter the name of the person collecting the sample             | Free response                                                                                                                                                                                                                     |
| 2   | Please select your clinic                                             | Free response                                                                                                                                                                                                                     |
| 3   | Patient ID and name                                                   | Free response                                                                                                                                                                                                                     |
| 4   | Cat research ID                                                       | Free response                                                                                                                                                                                                                     |
| 5   | Date presented for ringworm evaluation                                | Free response                                                                                                                                                                                                                     |
| 6   | Cat's age                                                             | <ul style="list-style-type: none"><li>• Kitten – less than 1 year old</li><li>• Adult – over 1 year old</li></ul>                                                                                                                 |
| 7   | Cat's sex and neuter status                                           | <ul style="list-style-type: none"><li>• Female – spayed</li><li>• Female – intact</li><li>• Female – unknown</li><li>• Male – castrated</li><li>• Male intact</li></ul>                                                           |
| 8   | Cat's breed                                                           | Free response                                                                                                                                                                                                                     |
| 9   | Cat's previous housing environment                                    | <ul style="list-style-type: none"><li>• Stray</li><li>• Single cat – owned household</li><li>• Multi cat – owned household</li><li>• Previously owned – other animals unknown</li><li>• Transferred from shelter</li></ul>        |
| 10  | Cat's current housing environment                                     | <ul style="list-style-type: none"><li>• Shelter/rescue – single cat kennel</li><li>• Shelter/rescue – multiple cat kennel</li><li>• Client owned – single cat household</li><li>• Client owned – multiple cat household</li></ul> |
| 11  | Is this cat currently receiving any medications (excluding vaccines)? | <ul style="list-style-type: none"><li>• Yes – topical parasite preventatives or dewormer</li><li>• Yes – oral parasite preventatives or dewormer</li><li>• Yes – other</li><li>• No</li></ul>                                     |
| 12  | Any other concurrent medical conditions?                              | Free response                                                                                                                                                                                                                     |
| 13a | Have diagnostics for ringworm been performed? (select all that apply) | <ul style="list-style-type: none"><li>• Wood's lamp</li><li>• Fungal culture</li><li>• IDEXX PCR</li><li>• Hair observed under microscope</li><li>• Other</li><li>• None</li></ul>                                                |
| 13b | If diagnostics have been performed, what were the results?            | Free response                                                                                                                                                                                                                     |

|     |                                                                       |                                                                                                                                                                                                                                                                                                                                                          |
|-----|-----------------------------------------------------------------------|----------------------------------------------------------------------------------------------------------------------------------------------------------------------------------------------------------------------------------------------------------------------------------------------------------------------------------------------------------|
| 14a | Has anti-fungal treatment been performed prior to sample collection?  | <ul style="list-style-type: none"> <li>• Yes</li> <li>• No</li> </ul>                                                                                                                                                                                                                                                                                    |
| 14b | If yes, what treatment and for how long?                              | Free response                                                                                                                                                                                                                                                                                                                                            |
| 15  | How many lesions are present?                                         | <ul style="list-style-type: none"> <li>• 1</li> <li>• 2-5</li> <li>• 5+</li> <li>• None – no lesions present</li> </ul>                                                                                                                                                                                                                                  |
| 16  | What is the average size of the lesions?                              | <ul style="list-style-type: none"> <li>• Less than 0.5 inch (smaller than a dime)</li> <li>• Between 0.5 inch and 1 inch (size of a penny)</li> <li>• Greater than 1 inch (larger than a penny)</li> <li>• N/A – no lesions present</li> </ul>                                                                                                           |
| 17  | Lesion distribution (select all that apply)                           | <ul style="list-style-type: none"> <li>• Head</li> <li>• Neck</li> <li>• Abdomen</li> <li>• Back</li> <li>• Tail including base of tail</li> <li>• Legs including paws</li> <li>• N/A – no lesions present</li> </ul>                                                                                                                                    |
| 18  | Lesion types (select all that apply)                                  | <ul style="list-style-type: none"> <li>• Alopecia</li> <li>• Scales/crusts</li> <li>• Reddened/erythematous</li> <li>• Papules/pustules</li> <li>• Miliary dermatitis</li> <li>• N/A – no lesions present</li> </ul>                                                                                                                                     |
| 19  | Rate the severity of the lesions                                      | <ul style="list-style-type: none"> <li>• Mild – lesions are small and confined to focal area</li> <li>• Mild to moderate</li> <li>• Moderate – lesions are found in multiple areas, but is not widespread</li> <li>• Moderate to severe</li> <li>• Severe – lesions are large and found all over the body</li> <li>• N/A – no lesions present</li> </ul> |
| 20  | Please upload pictures of lesions/alopecia, Wood's lamp or trichogram | Free response                                                                                                                                                                                                                                                                                                                                            |
| 21  | Any additional comments?                                              | Free response                                                                                                                                                                                                                                                                                                                                            |

Questions with multiple choice answers have all possible answers shown while questions that could have answers written in are listed as free response. N/A = not applicable.

**Table S2. Primers utilized for characterizing SUB3 and SSU1 genes.**

| Target | Pair | Orientation | Primer sequence 5' to 3'         | Reference                     |
|--------|------|-------------|----------------------------------|-------------------------------|
| SSU1   | 1    | Forward     | CAACCCAAGGATCCCAGGTC             | This paper                    |
|        |      | Reverse     | CGGGTGATCGAGATGGTGAG             |                               |
| SSU1   | 2    | Forward     | GAGCTTCAGGTCACAGCCAT             | This paper                    |
|        |      | Reverse     | GCATAGAATGGGCGGGATGA             |                               |
| SSU1   | 3    | Forward     | CTCACCATCTCGATCACCCG             | This paper                    |
|        |      | Reverse     | CGGATCCCCACATCACGTAG             |                               |
| SSU1   | 4    | Forward     | TACCTCTTCGCTCGAGACCA             | This paper                    |
|        |      | Reverse     | ACTCCTTGCCCATCTGTGTG             |                               |
| SSU1   | 5    | Forward     | CCCATTGCCGGTGAGATCTT             | This paper                    |
|        |      | Reverse     | GCGTTTATCGTCGAAGGGGA             |                               |
| SSU1   | 6    | Forward     | CACACAGATGGGCAAGGAGT             | This paper                    |
|        |      | Reverse     | CGGGGTTTTCTCTGAAGCT              |                               |
| SUB3   | 1    | Forward     | GTTCGAAAAGACGCGCTTTCTTTCACAACCGT | [Descamps <i>et al.</i> 2002] |
|        |      | Reverse     | GTAGCCCTATCTTCCAATTCCGTTGTA      |                               |

**Table S3. Clinical presentation data for *Microsporium canis* positive cats from CA, NM, CO (Boulder, Larimer), and MA.**

| Clinical Parameters                                                                                                                                                                                                     | CA (n=109)                                          | NM (n=31)                      | BC (n=6)                           | LC (n=4)          | MA (n=4)                                                                             |
|-------------------------------------------------------------------------------------------------------------------------------------------------------------------------------------------------------------------------|-----------------------------------------------------|--------------------------------|------------------------------------|-------------------|--------------------------------------------------------------------------------------|
| Age                                                                                                                                                                                                                     | Kitten<br>(99 %)                                    | Kitten<br>(97 %)               | Kitten<br>(100 %)                  | Kitten<br>(100 %) | Kitten<br>(25 %)                                                                     |
| Sex                                                                                                                                                                                                                     | Female<br>(49 %)                                    | Female<br>(45 %)               | Female<br>(50 %)                   | Female<br>(50 %)  | Female<br>(50 %)                                                                     |
| Neuter status                                                                                                                                                                                                           | Intact<br>(91 %)                                    | Intact<br>(94 %)               | Intact<br>(66.7 %)                 | Intact<br>(100 %) | Intact<br>(25 %)                                                                     |
| Breed                                                                                                                                                                                                                   | DSH<br>(92.6 %)<br>DMH<br>(4.6 %)<br>DLH<br>(2.8 %) | DSH<br>(84 %)<br>DMH<br>(16 %) | DSH<br>(83.3 %)<br>DMH<br>(16.6 %) | DSH<br>(100 %)    | DSH<br>(25 %)<br>DLH<br>(25 %)<br>Persian<br>(25 %)<br>Exotic<br>shorthair<br>(25 %) |
| Previous housing<br>environment<br>1. Stray<br>2. Single cat – owned<br>household<br>3. Multi cat – owned<br>household<br>4. Previously owned –<br>other animals<br>unknown<br>5. Transferred from<br>shelter           | 1 (98 %)<br>4 (1 %)<br>5 (1 %)                      | 1 (100 %)                      | 4<br>(16.6 %)<br>5<br>(83.3 %)     | 5<br>(100 %)      | 3 (75 %)<br>5 (25 %)                                                                 |
| Current housing<br>environment<br>1. Shelter/rescue –<br>single cat kennel<br>2. Shelter/rescue –<br>multiple cat kennel<br>3. Client owned –<br>single cat household<br>4. Client owned –<br>multiple cay<br>household | 1 (30 %)<br>2 (69 %)<br>3 (1 %)                     | 1 (19 %)<br>2 (81 %)           | 1<br>(16.6 %)<br>2<br>(83.3 %)     | 2<br>(100 %)      | 4 (100 %)                                                                            |
| Current medications*<br>1. Yes – topical<br>parasite<br>preventatives or<br>dewormer                                                                                                                                    | 1 (27.5 %)<br>2 (18.3 %)<br>3 (2 %)<br>4 (71.5 %)   | 2 (100 %)                      | 2<br>(100 %)                       | 4<br>(100 %)      | 1 (50 %)<br>3 (25 %)<br>4 (25 %)                                                     |

|                                                                                                                                           |                                                                                                                                       |                                                     |                                                    |                              |                                                          |
|-------------------------------------------------------------------------------------------------------------------------------------------|---------------------------------------------------------------------------------------------------------------------------------------|-----------------------------------------------------|----------------------------------------------------|------------------------------|----------------------------------------------------------|
| 2. Yes – oral parasite preventatives or dewormer<br>3. Yes – other<br>4. No                                                               |                                                                                                                                       |                                                     |                                                    |                              |                                                          |
| Concurrent medical conditions*                                                                                                            | URI (24 %)<br>ectoparasites (13 %)<br>Diarrhea (1 %)<br>Otitis media (1 %)<br>Degloved chin (1 %)<br>Underweight (1 %)<br>None (67 %) | URI (6.5 %)<br>Ectoparasites (3.2 %)<br>None (90 %) | None (100 %)                                       | None (100 %)                 | IBD (25 %)<br>superficial pyoderma (25 %)<br>None (75 %) |
| Diagnostics performed*<br>1. Wood’s lamp<br>2. Fungal culture<br>3. IDEXX PCR<br>4. Hair observed under microscope<br>5. Other<br>6. None | 1 (99 %)<br>6 (1 %)                                                                                                                   | 1 (93.5 %)<br>5 (6.5 %)                             | 1 (100 %)<br>2 (100 %)                             | 1 (100 %)<br>2 (100 %)       | 1 (100 %)<br>3 (100 %)<br>4 (50 %)<br>5 (25 %)           |
| If diagnostics have been performed, what were the results?                                                                                | Wood’s lamp positive (88 %)                                                                                                           | Wood’s lamp positive (92.9 %)                       | Wood’s lamp positive (50 %)                        | Wood’s lamp positive (100 %) | Wood’s lamp positive (75 %)                              |
| Number of lesions<br>1. 1<br>2. 2-5<br>3. 5+<br>4. None – no lesions present                                                              | 1 (16.5 %)<br>2 (42.2 %)<br>3 (36.7 %)<br>4 (4.6 %)                                                                                   | 1 (29 %)<br>2 (51.6 %)<br>3 (6.5 %)<br>4 (12.9 %)   | 1 (16.6 %)<br>2 (33.3 %)<br>4 (50 %)               | 2 (75 %)<br>3 (25 %)         | 1 (25 %)<br>3 (75 %)                                     |
| Size of lesions<br>1. Less than 0.5 inch (smaller than a dime)<br>2. Between 0.5 inch and 1 inch (size of a penny)                        | 1 (36.7 %)<br>2 (44 %)<br>3 (14.7 %)<br>4 (4.6 %)                                                                                     | 1 (64.5 %)<br>2 (22.6 %)<br>4 (12.9 %)              | 1 (16.6 %)<br>2 (16.6 %)<br>3 (16.6 %)<br>4 (50 %) | 2 (50 %)<br>3 (50 %)         | 1 (25 %)<br>2 (25 %)<br>3 (50 %)                         |

|                                                                          |            |            |          |          |           |
|--------------------------------------------------------------------------|------------|------------|----------|----------|-----------|
| 3. Greater than 1 inch (larger than a penny)                             |            |            |          |          |           |
| 4. N/A – no lesions present                                              |            |            |          |          |           |
| Lesion distribution*                                                     | 1 (88 %)   | 1 (64.5 %) | 1        | 1        | 1 (75 %)  |
| 1. Head                                                                  | 2 (33 %)   | 2 (12.9 %) | (16.6 %) | (100 %)  | 2 (75 %)  |
| 2. Neck                                                                  | 3 (29 %)   | 3 (29 %)   | 2        | 2 (50 %) | 3 (75 %)  |
| 3. Abdomen                                                               | 4 (24 %)   | 4 (6.5 %)  | (16.6 %) | 4 (25 %) | 4 (50 %)  |
| 4. Back                                                                  | 5 (25 %)   | 5 (3.2 %)  | 3        | 6        |           |
| 5. Tail including base of tail                                           | 6 (58 %)   | 6 (32.2 %) | (33.3 %) | (100 %)  |           |
| 6. Legs including paws                                                   | 7 (4.6 %)  | 7 (12.9 %) | 7 (50 %) |          |           |
| 7. N/A – no lesions present                                              |            |            |          |          |           |
| Lesion types*                                                            | 1 (94.5 %) | 1 (74 %)   | 1 (50 %) | 1        | 1 (100 %) |
| 1. Alopecia                                                              | 2 (64 %)   | 2 (55 %)   | 3        | (100 %)  | 2 (100 %) |
| 2. Scales/crusts                                                         | 3 (2.8 %)  | 3 (9.7 %)  | (33.3 %) | 2        | 3 (25 %)  |
| 3. Reddened/erythematous                                                 | 5 (1.8 %)  | 6 (12.9 %) | 6 (50 %) | (100 %)  |           |
| 4. Papules/pustules                                                      | 6 (4.6 %)  |            |          |          |           |
| 5. Miliary dermatitis                                                    |            |            |          |          |           |
| 6. N/A – no lesions present                                              |            |            |          |          |           |
| Disease severity                                                         | 1 (24.8 %) | 1 (61.3 %) | 1        | 4        | 1 (25 %)  |
| 1. Mild – lesions are small and confined to focal area                   | 2 (13.8 %) | 2 (9.7 %)  | (33.3 %) | (100 %)  | 2 (25 %)  |
| 2. Mild to moderate                                                      | 3 (31.2 %) | 3 (12.9 %) | 2        |          | 3 (25 %)  |
| 3. Moderate – lesions are found in multiple areas, but is not widespread | 4 (7.3 %)  | 4 (3.2 %)  | (16.6 %) |          | 4 (25 %)  |
| 4. Moderate to severe                                                    | 5 (18.3 %) | 6 (12.9 %) | 6 (50 %) |          |           |
| 5. Severe – lesions are large and found all over the body                | 6 (4.6 %)  |            |          |          |           |
| 6. N/A – no lesions present                                              |            |            |          |          |           |

No clinical data was collected for Weld County, CO. CA = California, NM = New Mexico, BC = Boulder County CO, LC = Larimer County CO, MA = Massachusetts, DSH = domestic shorthair, DMH = domestic medium hair, DLH = domestic long hair, N/A = not applicable, URI = upper respiratory infection, IBD = inflammatory bowel disease. \* = Percentages are greater than 100 as patients can have more than one answer.

**Table S4. Allele sizes for microsatellite regions one to eight (MS1, MS2, MS3, MS4, MS5, MS6, MS7, MS8) for *Microsporium canis* samples.**

| Sample ID | MS1 (bp) | MS2 (bp) | MS3 (bp) | MS4 (bp) | MS5 (bp) | MS6 (bp) | MS7 (bp) | MS8 (bp) | Genotype | Mating gene type |
|-----------|----------|----------|----------|----------|----------|----------|----------|----------|----------|------------------|
| BC1       | 117      | 97       | 116      | 157      | 102      | 109      | 127      | 116      | DF       | MAT1-1           |
| BC2       | 117      | 97       | 116      | 155      | 102      | 109      | 127      | 116      | DD       | MAT1-1           |
| BC3       | 117      | 97       | 116      | 159      | 102      | 111      | 125      | 116      | DI       | MAT1-1           |
| BC4       | 117      | 97       | 116      | 155      | 106      | 109      | 127      | 116      | DE       | MAT1-1           |
| BC5       | 117      | 97       | 116      | 155      | 102      | 109      | 127      | 116      | DD       | MAT1-1           |
| BC6       | 117      | 97       | 116      | 155      | 100      | 109      | 127      | 116      | DC       | MAT1-1           |
| CA1       | 113      | 97       | 114      | 155      | 102      | 109      | 125      | 116      | O        | MAT1-1           |
| CA2       | 115      | 97       | 114      | 155      | 106      | 109      | 125      | 116      | BC       | MAT1-1           |
| CA3       | 115      | 99       | 114      | 155      | 102      | 109      | 125      | 116      | CS       | MAT1-1           |
| CA4       | 115      | 99       | 114      | 157      | 102      | 109      | 125      | 116      | CV       | MAT1-1           |
| CA5       | 115      | 97       | 114      | 155      | 100      | 109      | 125      | 116      | AT       | MAT1-1           |
| CA6       | 115      | 97       | 114      | 155      | 106      | 109      | 125      | 116      | BC       | MAT1-1           |
| CA7       | 115      | 97       | 114      | 155      | 100      | 109      | 125      | 116      | AT       | MAT1-1           |
| CA8       | 115      | 97       | 114      | 155      | 100      | 109      | 125      | 116      | AT       | MAT1-1           |
| CA9       | 115      | 97       | 114      | 157      | 100      | 109      | 125      | 116      | BK       | MAT1-1           |
| CA10      | 115      | 97       | 114      | 155      | 100      | 109      | 125      | 116      | AT       | MAT1-1           |
| CA11      | NA       | 101      | NA       | 155      | 106      | 109      | 125      | 112      | DS       | MAT1-1           |
| CA12      | 105      | 101      | NA       | 155      | 96       | 109      | 125      | 112      | F        | MAT1-1           |
| CA13      | NA       | 101      | NA       | 155      | 104      | 105      | 125      | 112      | DR       | MAT1-1           |
| CA14      | 105      | 99       | NA       | 155      | 106      | 109      | 125      | 112      | E        | MAT1-1           |
| CA15      | NA       | 101      | NA       | 153      | 106      | 109      | 125      | 112      | DQ       | MAT1-1           |
| CA16      | 115      | 97       | 114      | 161      | 102      | 113      | 123      | 116      | CI       | MAT1-1           |
| CA17      | 115      | 97       | 114      | 155      | 100      | 107      | 125      | 116      | AS       | MAT1-1           |
| CA18      | 115      | 97       | 114      | 155      | 106      | 109      | 125      | 116      | BC       | MAT1-1           |
| CA19      | 115      | 97       | 114      | 159      | 100      | 109      | 123      | 116      | BY       | MAT1-1           |
| CA20      | 115      | 97       | 114      | NA       | 100      | 107      | 123      | 116      | CK       | MAT1-1           |
| CA21      | 115      | 97       | 114      | 159      | 106      | 109      | 123      | 116      | CC       | MAT1-1           |
| CA22      | 115      | 97       | 114      | 155      | 102      | 109      | 125      | 116      | AW       | MAT1-1           |
| CA23      | 113      | 99       | NA       | 155      | 98       | 109      | 125      | 112      | U        | MAT1-1           |
| CA24      | 117      | 97       | 116      | 139      | 102      | 109      | 125      | 116      | DA       | MAT1-1           |
| CA25      | 113      | 97       | 114      | 157      | 102      | 105      | 125      | 116      | R        | MAT1-1           |
| CA26      | 115      | 97       | 114      | 159      | 102      | 107      | 123      | 116      | CA       | MAT1-1           |
| CA27      | 115      | 97       | 114      | 161      | 102      | 107      | 123      | NA       | CF       | MAT1-1           |
| CA28      | 113      | 95       | 114      | 159      | 102      | 107      | 123      | 116      | J        | MAT1-1           |
| CA29      | 115      | 97       | 114      | 155      | 102      | NA       | 125      | 116      | AZ       | MAT1-1           |
| CA30      | 115      | 97       | 114      | 155      | 98       | NA       | 125      | 116      | AR       | MAT1-1           |
| CA31      | 113      | 97       | 114      | 153      | 102      | 109      | 125      | 116      | M        | MAT1-1           |

|      |     |    |     |     |     |     |     |     |    |        |
|------|-----|----|-----|-----|-----|-----|-----|-----|----|--------|
| CA32 | 115 | 97 | 114 | NA  | 100 | 109 | NA  | 116 | CL | MAT1-1 |
| CA33 | 113 | 97 | 114 | 155 | 102 | 107 | 125 | 116 | N  | MAT1-1 |
| CA34 | 113 | 99 | 114 | 155 | 102 | 109 | 125 | 116 | T  | MAT1-1 |
| CA35 | 113 | 97 | 114 | 155 | 102 | 109 | 125 | 116 | O  | MAT1-1 |
| CA36 | 113 | 97 | 114 | 155 | 102 | 109 | 125 | 116 | O  | MAT1-1 |
| CA37 | 115 | 97 | 114 | 155 | 98  | 109 | 125 | 116 | AN | MAT1-1 |
| CA38 | NA  | 99 | NA  | 153 | 96  | 109 | 125 | 112 | DJ | MAT1-1 |
| CA39 | NA  | 99 | NA  | 153 | 98  | 109 | 125 | 112 | DK | MAT1-1 |
| CA40 | 115 | 97 | 114 | 157 | 98  | 109 | 125 | 112 | BE | MAT1-1 |
| CA41 | 115 | 97 | 114 | 157 | 98  | 111 | 125 | 112 | BG | MAT1-1 |
| CA42 | 115 | 97 | NA  | 157 | 104 | NA  | NA  | 112 | CO | MAT1-1 |
| CA43 | 115 | 97 | 114 | 157 | 98  | 109 | 125 | 116 | BF | MAT1-1 |
| CA44 | 115 | 97 | 114 | 157 | 104 | 109 | 125 | 112 | BT | MAT1-1 |
| CA45 | 115 | 97 | 114 | 155 | 104 | NA  | 123 | 116 | BB | MAT1-1 |
| CA46 | 115 | 97 | 116 | 155 | 106 | NA  | 123 | 116 | CN | MAT1-1 |
| CA47 | 115 | 97 | 114 | 155 | 98  | 111 | 125 | 116 | AO | MAT1-1 |
| CA48 | 115 | 97 | 114 | 157 | 98  | NA  | 125 | 112 | BH | MAT1-1 |
| CA49 | 115 | 97 | 114 | 159 | 100 | NA  | 125 | 116 | BZ | MAT1-1 |
| CA50 | 115 | 97 | 114 | 157 | 102 | NA  | 125 | 116 | BR | MAT1-1 |
| CA51 | NA  | 99 | NA  | 153 | 98  | NA  | 125 | 112 | DL | MAT1-1 |
| CA52 | NA  | 99 | NA  | 153 | 98  | 109 | 125 | 112 | DK | MAT1-1 |
| CA53 | 115 | 97 | 114 | 153 | 100 | 109 | 125 | 116 | AK | MAT1-1 |
| CA54 | 115 | 97 | 114 | 153 | 102 | 113 | 125 | 116 | AM | MAT1-1 |
| CA55 | 115 | 97 | 114 | 153 | 102 | 109 | 125 | 116 | AL | MAT1-1 |
| CA56 | 115 | 97 | 114 | 103 | 100 | 107 | 125 | 116 | W  | MAT1-1 |
| CA57 | 115 | 97 | 114 | 157 | 96  | 105 | 125 | 112 | BD | MAT1-1 |
| CA58 | 115 | 97 | 114 | 155 | 100 | 109 | 125 | 116 | AT | MAT1-1 |
| CA59 | 115 | 97 | 114 | 157 | 102 | NA  | 125 | 116 | BR | MAT1-1 |
| CA60 | 115 | 97 | 114 | 159 | 98  | NA  | 125 | 112 | BW | MAT1-1 |
| CA61 | 115 | 97 | 114 | 155 | 100 | 109 | 125 | 116 | AT | MAT1-1 |
| CA62 | 115 | 97 | 114 | 157 | 102 | NA  | 125 | 116 | BR | MAT1-1 |
| CA63 | 115 | 97 | 114 | 103 | 100 | NA  | 125 | 116 | X  | MAT1-1 |
| CA64 | 115 | 97 | 114 | 157 | 100 | 109 | 125 | 116 | BK | MAT1-1 |
| CA65 | 115 | 97 | 114 | 157 | 100 | 109 | 123 | 116 | BI | MAT1-1 |
| CA66 | 115 | 97 | 114 | 161 | 102 | 107 | 123 | 116 | CE | MAT1-1 |
| CA67 | 115 | 97 | 114 | 159 | 100 | 107 | 121 | NA  | BX | MAT1-1 |
| CA68 | 115 | 97 | 114 | 155 | 100 | 107 | 125 | 116 | AS | MAT1-1 |
| CA69 | 115 | 99 | 114 | 103 | 102 | 107 | 125 | 116 | CP | MAT1-1 |
| CA70 | 115 | 97 | 114 | 155 | 98  | NA  | 125 | 112 | AQ | MAT1-1 |
| CA71 | 115 | 97 | 114 | 155 | 102 | 111 | 125 | 116 | AX | MAT1-1 |
| CA72 | 115 | 97 | 114 | 155 | 102 | NA  | 125 | 116 | AZ | MAT1-1 |

|       |     |     |     |     |     |     |     |     |    |        |
|-------|-----|-----|-----|-----|-----|-----|-----|-----|----|--------|
| CA73  | 115 | 97  | 114 | 155 | 102 | 107 | 125 | 116 | AV | MAT1-1 |
| CA74  | 115 | 97  | 114 | 155 | 98  | NA  | 121 | NA  | AP | MAT1-1 |
| CA75  | 115 | 97  | 114 | 103 | 102 | 107 | 125 | 116 | Y  | MAT1-1 |
| CA76  | 115 | 97  | 114 | 155 | 102 | 105 | 125 | 116 | AU | MAT1-1 |
| CA77  | 115 | 97  | 114 | 155 | 102 | NA  | 125 | 116 | AZ | MAT1-1 |
| CA78  | 115 | 97  | 114 | 155 | 102 | NA  | 125 | 116 | AZ | MAT1-1 |
| CA79  | 115 | 97  | 114 | 157 | 102 | NA  | 123 | 116 | BQ | MAT1-1 |
| CA80  | 111 | 99  | 114 | 157 | 102 | 107 | 125 | 116 | I  | MAT1-1 |
| CA81  | 115 | 97  | 114 | 157 | 102 | 107 | 125 | 116 | BM | MAT1-1 |
| CA82  | 115 | 97  | 114 | 157 | 102 | NA  | 125 | 116 | BR | MAT1-1 |
| CA83  | 115 | 97  | 114 | 157 | 102 | NA  | 125 | 116 | BR | MAT1-1 |
| CA84  | 115 | 97  | 114 | 157 | 102 | 115 | 125 | 116 | BP | MAT1-1 |
| CA85  | 115 | 99  | 114 | 157 | 102 | 107 | 125 | 116 | CU | MAT1-1 |
| CA86  | 115 | 97  | 114 | 157 | 102 | 109 | 125 | 116 | BO | MAT1-1 |
| CA87  | 115 | 97  | 114 | 157 | 102 | 109 | 125 | 116 | BO | MAT1-1 |
| CA88  | 115 | 97  | 114 | 157 | 102 | 107 | 125 | 116 | BN | MAT1-1 |
| CA89  | 115 | 97  | 114 | 157 | 102 | 115 | 125 | 116 | BP | MAT1-1 |
| CA90  | 115 | 97  | 114 | 155 | 100 | 107 | 125 | 116 | AS | MAT1-1 |
| CA91  | 115 | 97  | 114 | 157 | 102 | NA  | 125 | NA  | BS | MAT1-1 |
| CA92  | 117 | 97  | 116 | 157 | 102 | 113 | 125 | 116 | DH | MAT1-1 |
| CA93  | 115 | 97  | 114 | 155 | 102 | 111 | 125 | 116 | AX | MAT1-1 |
| CA94  | NA  | 99  | NA  | 155 | 98  | 109 | 125 | 112 | DM | MAT1-1 |
| CA95  | 115 | 97  | 114 | 157 | 102 | NA  | 125 | 116 | BR | MAT1-1 |
| CA96  | 115 | 99  | 114 | 155 | 100 | 107 | 125 | 116 | CR | MAT1-1 |
| CA97  | NA  | 99  | NA  | 155 | 106 | 109 | 125 | 112 | DO | MAT1-1 |
| CA98  | 115 | 97  | 114 | 157 | 102 | 109 | 125 | 116 | BO | MAT1-1 |
| CA99  | 115 | 97  | 114 | 155 | 102 | 115 | 125 | 116 | AY | MAT1-1 |
| CA100 | 115 | 97  | 114 | 155 | 100 | 109 | 125 | 116 | AT | MAT1-1 |
| CA101 | NA  | 99  | NA  | 155 | 98  | 109 | 125 | 112 | DM | MAT1-1 |
| CA102 | 115 | 97  | 114 | 161 | 102 | 109 | 123 | 116 | CG | MAT1-1 |
| CA103 | 115 | 97  | 114 | 161 | 100 | NA  | 123 | 116 | CD | MAT1-1 |
| CA104 | 115 | 99  | 114 | 155 | 102 | NA  | 123 | 116 | CT | MAT1-1 |
| CA105 | 113 | 97  | 114 | NA  | 100 | NA  | 125 | 116 | S  | MAT1-1 |
| CA106 | 115 | 97  | 114 | 157 | 106 | 105 | 123 | 116 | BU | MAT1-1 |
| CA107 | 115 | 97  | 114 | 127 | 102 | 109 | 125 | 116 | AF | MAT1-1 |
| CA108 | 115 | 97  | 114 | 155 | 102 | 109 | 125 | 116 | AW | MAT1-1 |
| CA109 | 115 | 97  | 114 | 155 | 102 | NA  | 125 | 116 | AZ | MAT1-1 |
| CA110 | 115 | 97  | 114 | 155 | 102 | NA  | 125 | 116 | AZ | MAT1-1 |
| CA111 | 115 | 97  | 114 | 155 | 102 | NA  | 125 | 116 | AZ | MAT1-1 |
| CA112 | 105 | 99  | NA  | 155 | 98  | 111 | 125 | 112 | C  | MAT1-1 |
| CA113 | 105 | 101 | NA  | 155 | 98  | 111 | 125 | 112 | G  | MAT1-1 |

|       |     |     |     |     |     |     |     |     |    |        |
|-------|-----|-----|-----|-----|-----|-----|-----|-----|----|--------|
| CA114 | 105 | 99  | NA  | 155 | 98  | NA  | 125 | 112 | D  | MAT1-1 |
| CA115 | NA  | 99  | NA  | 155 | 98  | NA  | 125 | 112 | DN | MAT1-1 |
| CA116 | 105 | 99  | NA  | 155 | 98  | 107 | 125 | 112 | B  | MAT1-1 |
| CA117 | 105 | 99  | NA  | 155 | 98  | NA  | 125 | 112 | D  | MAT1-1 |
| CA118 | NA  | 99  | NA  | 155 | 98  | 109 | 125 | 112 | DM | MAT1-1 |
| CA119 | 105 | 99  | NA  | 155 | 98  | NA  | 125 | 112 | D  | MAT1-1 |
| CA120 | NA  | 101 | NA  | 153 | 98  | 111 | 125 | 112 | DP | MAT1-1 |
| CA121 | 105 | 99  | NA  | 155 | 98  | NA  | 125 | 112 | D  | MAT1-1 |
| CA122 | 115 | 97  | 114 | 157 | 102 | 115 | 125 | 116 | BP | MAT1-1 |
| LC1   | 115 | 97  | 114 | 119 | 100 | 111 | 125 | 116 | AD | MAT1-1 |
| LC2   | 115 | 97  | 114 | 119 | 100 | 111 | 125 | 116 | AD | MAT1-1 |
| LC3   | 115 | 97  | 114 | 119 | 100 | 111 | 125 | 116 | AD | MAT1-1 |
| LC4   | 113 | 97  | 114 | 119 | 106 | 111 | 125 | 116 | L  | MAT1-1 |
| MA1   | 117 | 97  | 116 | 141 | 102 | 105 | 125 | 116 | DB | MAT1-1 |
| MA2   | 115 | 97  | 116 | 141 | 102 | 109 | 127 | 116 | CM | MAT1-1 |
| MA3   | 109 | 97  | 110 | 121 | 104 | 109 | 123 | 118 | H  | MAT1-1 |
| MA4   | 115 | 97  | 114 | 157 | 100 | 111 | 123 | 116 | BL | MAT1-1 |
| MA5   | 113 | 97  | 114 | 157 | 102 | 105 | 125 | 116 | R  | MAT1-1 |
| NJ1   | 115 | 97  | 114 | 121 | 102 | 109 | 123 | 116 | AE | MAT1-1 |
| NM1   | 115 | 97  | 114 | 157 | 106 | 109 | 125 | 116 | BV | MAT1-1 |
| NM2   | 115 | 97  | 114 | 155 | 106 | 109 | 125 | 116 | BC | MAT1-1 |
| NM3   | 115 | 97  | 114 | 155 | 100 | 109 | 125 | 116 | AT | MAT1-1 |
| NM4   | 115 | 97  | 114 | 155 | 106 | 109 | 125 | 116 | BC | MAT1-1 |
| NM5   | 115 | 97  | 114 | 137 | 106 | 109 | 125 | 116 | AJ | MAT1-1 |
| NM6   | 115 | 97  | 114 | 155 | 100 | 109 | 125 | 116 | AT | MAT1-1 |
| NM7   | 115 | 97  | 114 | 155 | 106 | 109 | 125 | 116 | BC | MAT1-1 |
| NM8   | 115 | 97  | 114 | 155 | 102 | 107 | 125 | 116 | AV | MAT1-1 |
| NM9   | 115 | 97  | 114 | 155 | 106 | 109 | 125 | 116 | BC | MAT1-1 |
| NM10  | 105 | 97  | 114 | 155 | 100 | 109 | 125 | 116 | A  | MAT1-1 |
| NM11  | 115 | 97  | 114 | 161 | 106 | 111 | 125 | 116 | CJ | MAT1-1 |
| NM12  | 115 | 97  | 114 | 161 | 106 | 111 | 125 | 116 | CJ | MAT1-1 |
| NM13  | 115 | 97  | 114 | 161 | 102 | 109 | 125 | 116 | CH | MAT1-1 |
| NM14  | 115 | 101 | 114 | 155 | 102 | 109 | 125 | 116 | CY | MAT1-1 |
| NM15  | 115 | 97  | 114 | 137 | 100 | 109 | 125 | 116 | AG | MAT1-1 |
| NM16  | 115 | 97  | 114 | 137 | 104 | 109 | 125 | 116 | AI | MAT1-1 |
| NM17  | 115 | 97  | 114 | 137 | 102 | 109 | 125 | 116 | AH | MAT1-1 |
| NM18  | 115 | 97  | 114 | 157 | 102 | 109 | 125 | 116 | BO | MAT1-1 |
| NM19  | 115 | 101 | 114 | 159 | 102 | 107 | 125 | 116 | CZ | MAT1-1 |
| NM20  | 115 | 97  | 114 | 159 | 102 | NA  | 125 | 116 | CB | MAT1-1 |
| NM21  | 115 | 97  | 114 | 157 | 100 | 109 | 125 | 114 | BJ | MAT1-1 |
| NM22  | 115 | 97  | 114 | 157 | 102 | 109 | 125 | 116 | BO | MAT1-1 |

|               |     |    |     |     |     |     |     |     |    |        |
|---------------|-----|----|-----|-----|-----|-----|-----|-----|----|--------|
| NM23          | 115 | 97 | 114 | 157 | 102 | 109 | 125 | 116 | BO | MAT1-1 |
| NM24          | 115 | 99 | 114 | 159 | 102 | 109 | 125 | 116 | CW | MAT1-1 |
| NM25          | 115 | 97 | 114 | 157 | 102 | 109 | 125 | 116 | BO | MAT1-1 |
| NM26          | 115 | 97 | 114 | 157 | 102 | 109 | 125 | 116 | BO | MAT1-1 |
| NM27          | 115 | 99 | 116 | 157 | 102 | 111 | NA  | 116 | CX | MAT1-1 |
| NM28          | 115 | 97 | 114 | 157 | 102 | 109 | 125 | 116 | BO | MAT1-1 |
| NM29          | 115 | 97 | 114 | 155 | 102 | 109 | 125 | 116 | AW | MAT1-1 |
| NM30          | 115 | 97 | 114 | 155 | 98  | 109 | 125 | 116 | AN | MAT1-1 |
| NM31          | 115 | 99 | 114 | 155 | 102 | 109 | 125 | 116 | CS | MAT1-1 |
| NM32          | 113 | 97 | 114 | 105 | 104 | NA  | 123 | 116 | K  | MAT1-1 |
| NM33          | 113 | 97 | 114 | 157 | 100 | NA  | NA  | 116 | Q  | MAT1-1 |
| NM34          | 115 | 95 | 114 | 155 | 100 | 111 | 123 | 116 | V  | MAT1-1 |
| NM35          | 115 | 97 | 114 | 155 | 104 | 109 | 125 | 116 | BA | MAT1-1 |
| NM36          | 113 | 97 | 114 | 157 | 98  | 109 | 123 | 116 | P  | MAT1-1 |
| WC1           | 117 | 97 | 116 | 157 | 102 | 111 | 125 | 116 | DG | MAT1-1 |
| WC2           | 115 | 97 | 114 | 105 | 102 | 109 | 125 | 116 | AA | MAT1-1 |
| WC3           | 115 | 97 | 114 | 105 | 102 | 109 | 125 | 116 | AA | MAT1-1 |
| WC4           | 115 | 97 | 114 | 105 | 102 | 107 | 125 | 116 | Z  | MAT1-1 |
| WC5           | 115 | 99 | 114 | 103 | 102 | 109 | 125 | 116 | CQ | MAT1-1 |
| WC6           | 115 | 97 | 114 | 105 | 102 | NA  | 125 | 116 | AB | MAT1-1 |
| CBS11<br>3480 | 115 | 97 | 114 | 107 | 104 | 109 | 117 | 116 | AC | MAT1-1 |

Of the clinical samples, 122 unique genotypes were observed with genotypes AT and BO being the most common (n=9 for each genotype). Samples were from Boulder County, CO (BC); California (CA); Larimer County, CO (LC); Massachusetts (MA); New Jersey (NJ); New Mexico (NM); and Weld County, CO (WC). CBS113480 isolate was included as a reference strain. NA = missing genotype.

**Table S5. Clinic location and disease severity were significantly associated with genetic distance.**

| <b>Clinical parameter</b> | <b>Degrees of Freedom</b> | <b>Sum of Squares</b> | <b>F</b> | <b>P-value</b> |
|---------------------------|---------------------------|-----------------------|----------|----------------|
| Clinic Location           | 4                         | 3.0954                | 4.3127   | 0.001*         |
| Sex/Intact Status         | 3                         | 0.6237                | 1.1586   | 0.253          |
| Size of Lesions           | 3                         | 0.7176                | 1.3332   | 0.141          |
| Number of Lesions         | 1                         | 0.1633                | 0.9099   | 0.463          |
| Disease Severity          | 1                         | 0.6206                | 3.4587   | 0.004*         |
| Previous Housing          | 3                         | 0.7955                | 1.4778   | 0.139          |

Analysis of variance of the distance-based redundancy analysis. \* = P-values were considered significant if less than 0.05). Samples from California; Boulder County, CO; Larimer County, CO; Massachusetts; and New Mexico were included in this analysis.

**Table S6. Clinic location and disease severity were significantly associated with genetic distance.**

| <b>Clinical parameter</b> | <b>Degrees of Freedom</b> | <b>Sum of Squares</b> | <b>F</b> | <b>P-value</b> |
|---------------------------|---------------------------|-----------------------|----------|----------------|
| Clinic Location           | 1                         | 0.5337                | 2.998    | 0.012*         |
| Sex/Intact Status         | 3                         | 0.7643                | 1.431    | 0.127          |
| Size of Lesions           | 3                         | 0.5680                | 1.0634   | 0.348          |
| Number of Lesions         | 1                         | 0.2162                | 1.2143   | 0.234          |
| Disease Severity          | 1                         | 0.6009                | 3.3753   | 0.011*         |
| Previous Housing          | 1                         | 0.0774                | 0.4348   | 0.751          |

Analysis of variance of the distance-based redundancy analysis. \* = P-values were considered significant if less than 0.05). Samples from California and New Mexico were included in this analysis as they had more than 10 individuals per clinic.
